# Supplementary material
Source: Research Square preprint supplement (doi:10.21203/rs.3.rs-10063611/v1)
Supplement: Supplementary file 1 [file 0fca36c57f26575a8d2b5502.docx]

**CONSORT 2025 checklist of information to include when reporting a randomised trial***

| **Section / Topic** | **No** | **CONSORT 2025 checklist item description** | **Reported on page no.** |
| --- | --- | --- | --- |
| **Title and abstract** | | |  |
| Title and structured abstract | 1a | Identification as a randomised trial | p. 1, lines 1–3 |
| 1b | Structured summary of the trial design, methods, results, and conclusions | p. 1, lines 11–38 |
| **Open science** | | |  |
| Trial registration | 2 | Name of trial registry, identifying number (with URL) and date of registration | p. 2, lines 39–40; p. 3, lines 78–81; p. 12, lines 426–428 |
| Protocol and statistical analysis plan | 3 | Where the trial protocol and statistical analysis plan can be accessed | Not reported in the manuscript |
| Data sharing | 4 | Where and how the individual de-identified participant data (including data dictionary), statistical code and any other materials can be accessed | p. 13, lines 437–439 |
| Funding and conflicts of interest | 5a | Sources of funding and other support (e.g., supply of drugs), and role of funders in the design, conduct, analysis and reporting of the trial | p. 13, lines 443–448 |
| 5b | Financial and other conflicts of interest of the manuscript authors | p. 13, lines 441–442 |
| **Introduction** | | |  |
| Background and rationale | 6 | Scientific background and rationale | p. 2, lines 45–71; p. 3, lines 72–74 |
| Objectives | 7 | Specific objectives related to benefits and harms | p. 2, lines 69–71; p. 3, lines 72–74; p. 6, lines 191–195 |
| **Methods** | | |  |
| Patient and public involvement | 8 | Details of patient or public involvement in the design, conduct and reporting of the trial | Not reported in the manuscript |
| Trial design | 9 | Description of trial design including type of trial (e.g., parallel group, crossover), allocation ratio, and framework (e.g., superiority, equivalence, non-inferiority, exploratory) | p. 3, lines 76–77; p. 3, lines 96–99 |
| Changes to trial protocol | 10 | Important changes to the trial after it commenced including any outcomes or analyses that were not prespecified, with reason | p. 11, lines 395–404 (exploratory outcomes not prespecified; no other protocol changes reported) |
| Trial setting | 11 | Settings (e.g., community, hospital) and locations (e.g., countries, sites) where the trial was conducted | p. 3, lines 76–77; p. 4, lines 106–107 |
| Eligibility criteria | 12a | Eligibility criteria for participants | p. 3, lines 85–92 |
| 12b | If applicable, eligibility criteria for sites and for individuals delivering the interventions (e.g., surgeons, physiotherapists) | p. 3, lines 100–104; p. 4, lines 115–116 |
| Intervention and comparator | 13 | Intervention and comparator with sufficient details to allow replication. If relevant, where additional materials describing the intervention and comparator (e.g., intervention manual) can be accessed | p. 4, lines 106–142; p. 5, lines 143–175; Fig. 6, p. 15, lines 539–552 |
| Outcomes | 14 | Pre-specified primary and secondary outcomes, including the specific measurement variable (e.g., systolic blood pressure), analysis metric (e.g., change from baseline, final value, time to event), method of aggregation (e.g., median, proportion), and time point for each outcome | p. 5, lines 177–180; p. 6, lines 181–199 |
| Harms | 15 | How harms were defined and assessed (e.g., systematically, non-systematically) | p. 6, lines 191–195; p. 9, lines 299–303; Table 3, p. 17, lines 567–573 |
| Sample size | 16a | How sample size was determined, including all assumptions supporting the sample size calculation | p. 6, lines 201–210 |
| 16b | Explanation of any interim analyses and stopping guidelines | Not reported in the manuscript |
| Randomisation: |  |  |  |
| Sequence generation | 17a | Who generated the random allocation sequence and the method used | p. 3, lines 94–96 |
| 17b | Type of randomisation and details of any restriction (e.g., stratification, blocking and block size) | p. 3, lines 96–99 (1:1 allocation; restriction details not reported) |
| Allocation concealment mechanism | 18 | Mechanism used to implement the random allocation sequence (e.g., central computer/telephone; sequentially numbered, opaque, sealed containers), describing any steps to conceal the sequence until interventions were assigned | p. 3, lines 96–99 |
| Implementation | 19 | Whether the personnel who enrolled and those who assigned participants to the interventions had access to the random allocation sequence | p. 3, lines 94–99 |
| Blinding | 20a | Who was blinded after assignment to interventions (e.g., participants, care providers, outcome assessors, data analysts) | p. 3, lines 100–105; p. 11, lines 386–389 |
| 20b | If blinded, how blinding was achieved and description of the similarity of interventions | p. 3, lines 100–105; p. 11, lines 386–389 |
| Statistical methods | 21a | Statistical methods used to compare groups for primary and secondary outcomes, including harms | p. 6, lines 212–215; p. 7, lines 216–240 |
| 21b | Definition of who is included in each analysis (e.g., all randomised participants), and in which group | p. 6, lines 212–215; p. 7, lines 247–249 |
| 21c | How missing data were handled in the analysis | p. 6, lines 212–215; p. 7, lines 246–249 |
| 21d | Methods for any additional analyses (e.g., subgroup and sensitivity analyses), distinguishing prespecified from post-hoc | p. 7, lines 225–235; p. 8, lines 267–271; p. 9, lines 289–292 |
| **Results** | | |  |
| Participant flow, including flow diagram | 22a | For each group, the numbers of participants who were randomly assigned, received intended intervention, and were analysed for the primary outcome | p. 7, lines 244–249; Fig. 1, p. 15, lines 523–525 |
| 22b | For each group, losses and exclusions after randomisation, together with reasons | p. 6, lines 212–215; p. 7, lines 246–249 |
| Recruitment | 23a | Dates defining the periods of recruitment and follow-up for outcomes of benefits and harms | p. 3, lines 76–77; p. 6, lines 181–195 |
| 23b | If relevant, why the trial ended or was stopped | Not applicable; no early stopping reported. Planned randomized sample reported at p. 7, lines 244–249 |
| Intervention and comparator delivery | 24a | Intervention and comparator as they were actually administered (e.g., where appropriate, who delivered the intervention/comparator, how participants adhered, whether they were delivered as intended [fidelity]) | p. 4, lines 106–142; p. 7, lines 244–249 |
| 24b | Concomitant care received during the trial for each group | p. 5, lines 143–175 |
| Baseline data | 25 | A table showing baseline demographic and clinical characteristics for each group | Table 1, p. 16, lines 555–557 |
| Numbers analysed,  outcomes and estimation | 26 | For each primary and secondary outcome, by group:   - the number of participants included in the analysis - the number of participants with available data at the outcome time point - result for each group, and the estimated effect size and its precision (such as 95% confidence interval) - for binary outcomes, presentation of both absolute and relative effect size | p. 8, lines 254–283; p. 8, lines 284–288; p. 9, lines 289–298; Table 2, p. 16, lines 562–566; Table 3, p. 17, lines 567–573 |
| Harms | 27 | All harms or unintended events in each group | p. 9, lines 299–303; Table 3, p. 17, lines 567–573 |
| Ancillary analyses | 28 | Any other analyses performed, including subgroup and sensitivity analyses, distinguishing pre-specified from post-hoc | p. 7, lines 225–235; p. 8, lines 267–271; p. 9, lines 289–292; p. 11, lines 395–404 |
| **Discussion** | | |  |
| Interpretation | 29 | Interpretation consistent with results, balancing benefits and harms, and considering other relevant evidence | p. 9, lines 306–317; p. 10, lines 327–365; p. 12, lines 405–412 |
| Limitations | 30 | Trial limitations, addressing sources of potential bias, imprecision, generalisability, and, if relevant, multiplicity of analyses | p. 11, lines 385–404 |

*We strongly recommend reading this statement in conjunction with the CONSORT 2025 Explanation and Elaboration and/or the CONSORT 2025 Expanded Checklist for important clarifications on all the items. We also recommend reading relevant CONSORT extensions. See [www.consort-spirit.org](http://www.consort-spirit.org).

Citation: Hopewell S, Chan AW, Collins GS, Hróbjartsson A, Moher D, Schulz KF, et al. CONSORT 2025 Statement: updated guideline for reporting randomised trials. BMJ. 2025; 388:e081123. <https://dx.doi.org/10.1136/bmj-2024-081123>.

© 2025 Hopewell et al. This is an Open Access article distributed under the terms of the Creative Commons Attribution License (<https://creativecommons.org/licenses/by/4.0/>), which permits unrestricted use, distribution, and reproduction in any medium, provided the original work is properly cited.
